# Supplementary material for: A green porous solid carbon source supports denitrification in low C/N salinity wastewater
Source: Royal Society of Chemistry journal article supplement (doi:10.1039/c6ra28447g), 2017-01-01
Supplement: c6ra28447g1.pdf [file c6ra28447g1.pdf]

# Supporting Information

## A Green Porous Solid Carbon Source Supported Denitrification in Low C/N Salinity Wastewater

Hua Li, Jiasong Zhang<sup>&</sup>, Ziming Zhou, Qingsong Liu, Hongbiao Dong, Yafei Duan, Chunhou Li<sup>\*</sup>

Key Lab of South China Sea Fishery Resources Exploitation & Utilization, Ministry of Agriculture;

South China Sea Fisheries Research Institute, Chinese Academy of Fishery Science, Guangzhou,

510300, China.

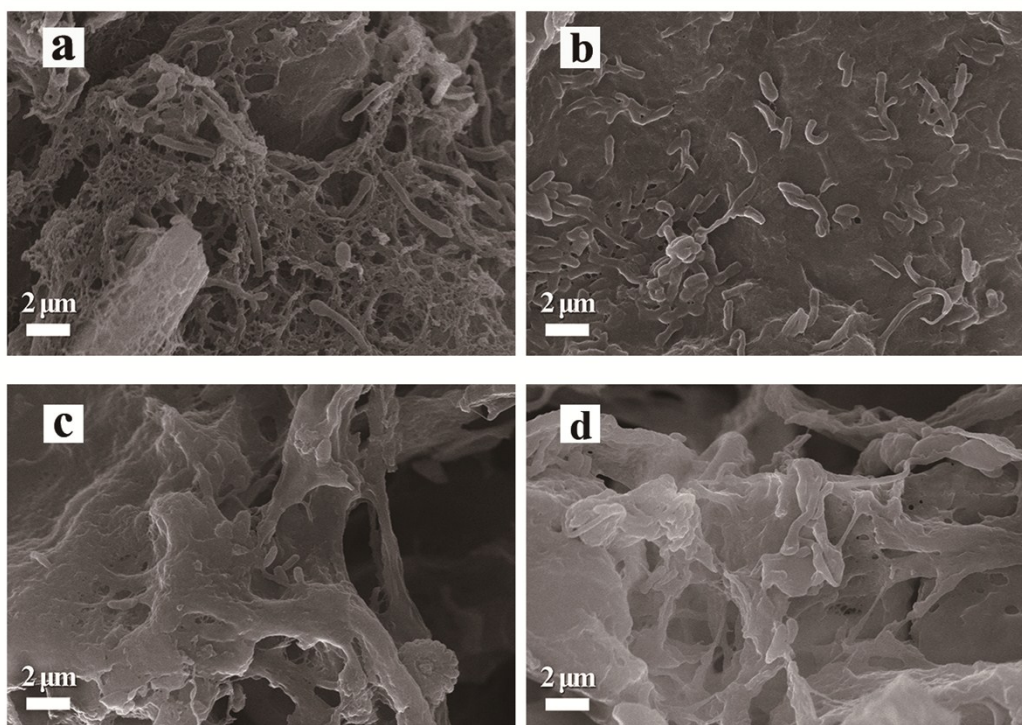

Fig. S1 The SEM images of composite on the 6th day. a. KGM:SL=3:1, b. KGM:SL=3:3, c. KGM:SL=3:5, d. KGM:SL=3:7.

<sup>&</sup> These authors contributed to the work equally and should be regarded as co-first authors.

<sup>\*</sup>Corresponding author, E-mail: [scslch@vip.163.com](mailto:scslch@vip.163.com) (Prof. Li Chunhou), Tel: +86-20-89108353.

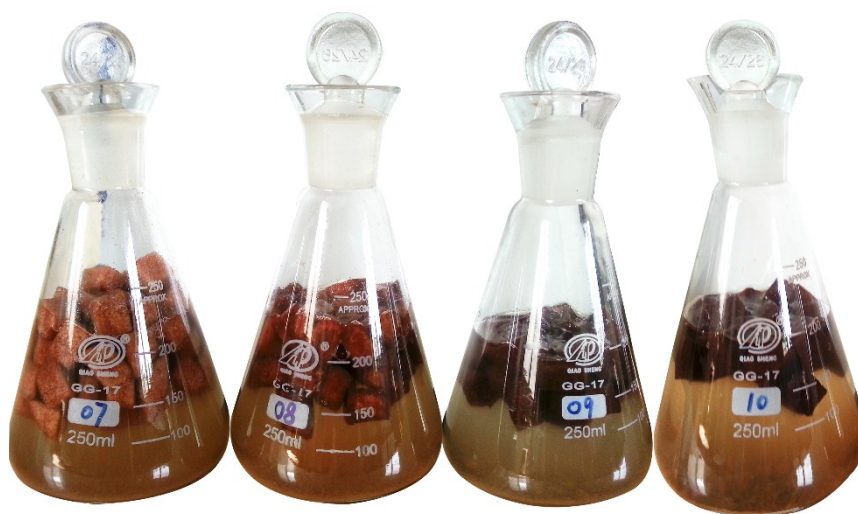

1 d

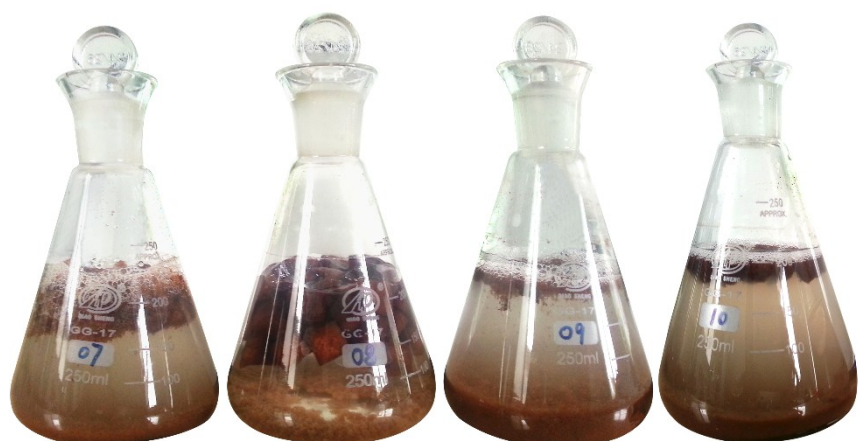

8 d

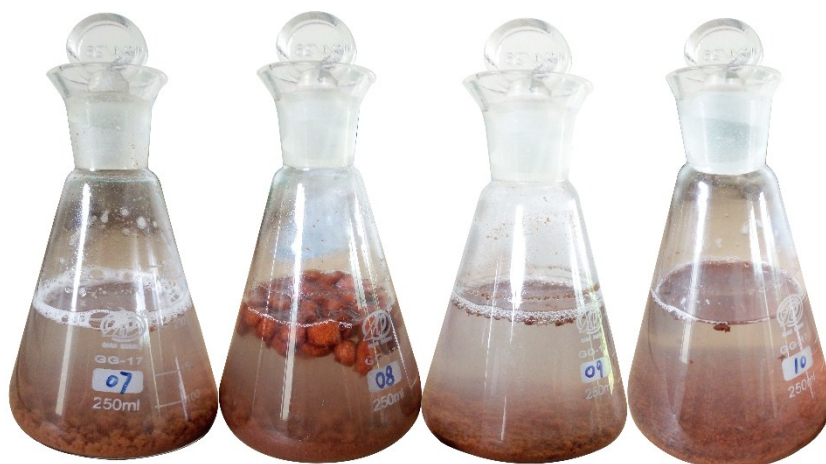

13 d

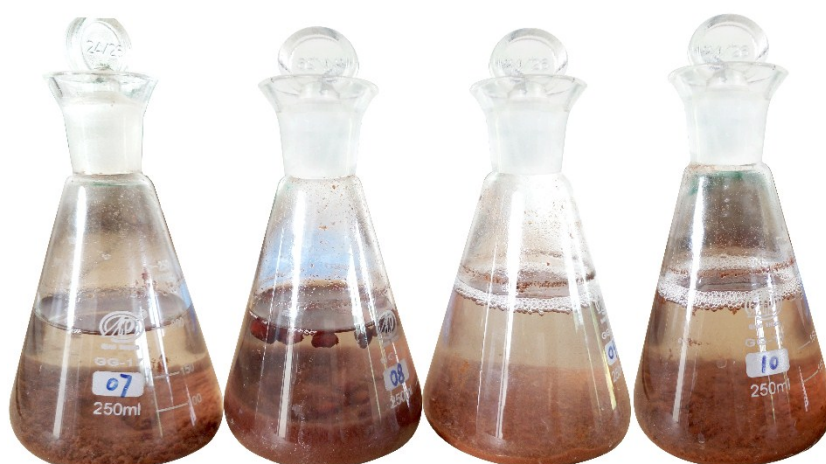

21 d

Fig. S2 The photographs of composites during the denitrification reactions.

07: KGM:SL=3:1, 08: KGM:SL=3:3, 09: KGM:SL=3:5,  
10: KGM:SL=3:7.

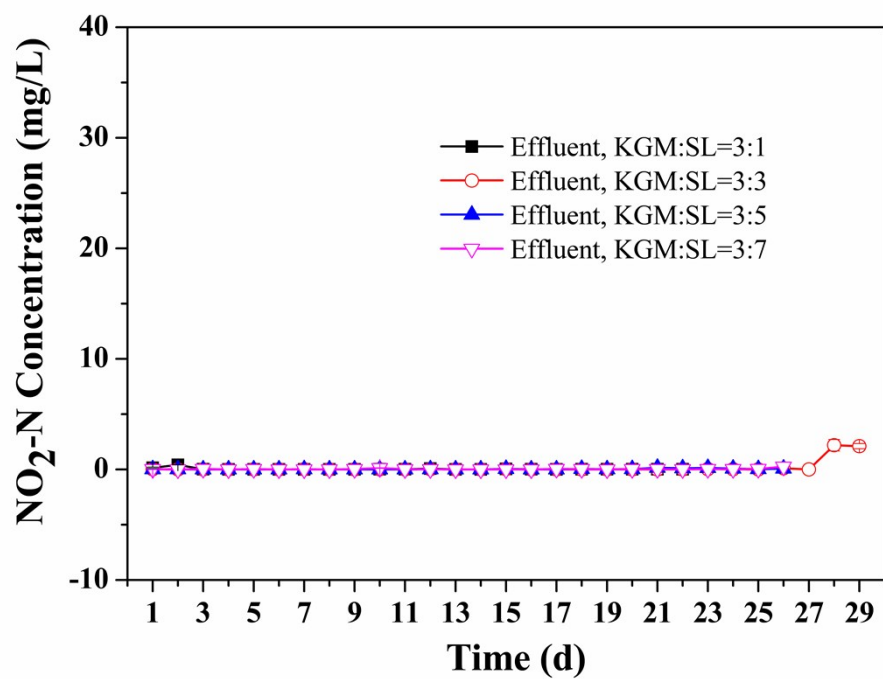

Fig. S3 The concentration of NO<sub>2</sub>-N in effluent
